# Supplementary material for: Metrics for Assessing Cytoskeletal Orientational Correlations and Consistency
Source: PubMed Central journal article supplement (PMC4388480; doi:10.1371/journal.pcbi.1004190), 2015-04-07
Supplement: pcbi.1004190.s001.pdf [file pcbi.1004190.s001.pdf]

## 1 Supplemental Text S1

### 2 Orientational Order Parameter (OOP)

3 The OOP characterizes the order of orientation of a single construct. For disordered systems the OOP  
4 is zero and for perfectly aligned systems it is one. The OOP is calculated by using a set of vectors,  $\vec{p}_i$ ,  
5 and forming a tensor for each of the vectors. The mean tensor is:

$$\mathbb{T} = \left\langle 2 \begin{bmatrix} p_{i,x}p_{i,x} & p_{i,x}p_{i,y} \\ p_{i,x}p_{i,y} & p_{i,y}p_{i,y} \end{bmatrix} - \begin{bmatrix} 1 & 0 \\ 0 & 1 \end{bmatrix} \right\rangle = \{Mean\ tensor\}. \quad (1)$$

6 The OOP is defined as the maximum eigenvalue of the mean tensor

$$\begin{aligned} OOP &= \max [\text{eigenvalue}(\mathbb{T})] = \{Orientational\ order\ parameter\} \\ &= \left\langle 2\{\vec{p}_i \cdot \hat{n}_p\}^2 - 1 \right\rangle = \left\langle \cos(2(\alpha - \alpha_0)) \right\rangle \end{aligned} \quad (2)$$

7 where  $\hat{n}_p$  and  $\alpha_0$  are the director and mean angle, respectively.

### 8 Symmetry of OOP

9 The OOP also has pseudo-vector symmetry and this can be easily shown. To check for symmetry we need  
10 to vary the sign of  $\vec{p}_i$  and  $\hat{n}_p$ . If we change the sign of  $\vec{p}_i$ ,  $\hat{n}_p$  or both we obtain:

$$\left\langle 2\{-\vec{p}_i \cdot \hat{n}_p\}^2 - 1 \right\rangle = \left\langle 2\{\vec{p}_i \cdot (-\hat{n}_p)\}^2 - 1 \right\rangle = \left\langle 2\{-\vec{p}_i \cdot (-\hat{n}_p)\}^2 - 1 \right\rangle = \left\langle 2\{\vec{p}_i \cdot \hat{n}_p\}^2 - 1 \right\rangle. \quad (3)$$

11 Thus, we will produce the same OOP no matter the sign of  $\vec{p}_i$  and  $\hat{n}_p$  therefore the OOP is symmetric.

### 12 Second order correlations

13 The OOP is not able to characterize second order correlations. To prove this define P as:

$$\vec{p}_i = \left[ \cos\left(\frac{\pi}{2}\right), \sin\left(\frac{\pi}{2}\right) \right] \text{ and } \vec{p}_{i+n} = \left[ \cos\left(-\frac{\pi}{2}\right), \sin\left(-\frac{\pi}{2}\right) \right] \quad (4)$$

14 for  $i = 1, \dots, n$ . Thus, ( $\hat{n}_p = 0$  and  $\alpha_0 = 0$ ):

$$OOP_P = \sum_{i=1}^{2n} \cos(2\alpha) = n \cdot \cos\left(2\frac{\pi}{2}\right) + n \cdot \cos\left(2\left(-\frac{\pi}{2}\right)\right) = 0. \quad (5)$$

15 Thus,  $OOP=0$  even though there is obvious organization in P.

### 16 **Circular Statistics (assume period of $\pi$ )**

17 It is possible to show that the R of circular statistics [1] is the same as the OOP. If the data is distributed:

$$\alpha = \frac{2\pi x}{k} \quad (6)$$

18 where,  $x$  is the data in the original scale,  $k$  is the total number of steps on the  $x$  scale, and  $\alpha$  is the  
 19 variable on the new directional scale (i.e. with a standard  $2\pi$  period). In our case a rod that is  $\beta$  degrees  
 20 away from the director is physically the same rod as the one  $\beta + \pi$  degrees away. Therefore in our case  
 21  $k = \pi$  and:

$$\alpha = 2\theta \quad (7)$$

22 where,  $\theta$  is defined as the angle that we measured from the director. From this it follows:

$$S = \frac{1}{N} \sum_{i=1}^N \sin 2\theta_i \quad (8)$$

$$C = \frac{1}{N} \sum_{i=1}^N \cos 2\theta_i \quad (9)$$

$$R = \sqrt{S^2 + C^2}. \quad (10)$$

23 If we assume that the director is orientated such that  $\theta_n = 0$ , then the angles are evenly distributed  
 24 between positive and negative and therefore  $S = 0$ . We can then write  $R$  as:

$$R = C = \frac{1}{N} \sum_{i=1}^N \cos 2\theta_i = \langle \cos 2\theta_i \rangle. \quad (11)$$

25 Therefore, by definition of the director we will have the range  $0 < R < 1$  and it is equivalent to the  
 26  $OO P = 2\langle \cos^2 \theta_i \rangle - 1 = \langle \cos 2\theta_i \rangle = R$ .

## 27 Circular Correlation

28 In the special case, with both constructs having a uniform distribution, i.e. both being perfectly isotropic,  
 29 the correlation coefficient and COOP converge to the same equation. If the angles are uniformly dis-  
 30 tributed on the circle the correlation coefficient [2] can be written as

$$r = \sqrt{\left(\frac{1}{N} \sum_{i=1}^N \cos 2\theta_i\right)^2 + \left(\frac{1}{N} \sum_{i=1}^N \sin 2\theta_i\right)^2} \quad (12)$$

31 where  $\theta$  represents the angle between two biological constructs. If the director is to be assumed  $\hat{n} = [1, 0]$   
 32 then  $\langle \sin 2\theta_i \rangle = 0$ , and therefore

$$r = \sqrt{\left(\frac{1}{N} \sum_{i=1}^N \cos 2\theta_i\right)^2} = \langle \cos 2\theta_i \rangle. \quad (13)$$

33 Thus,  $COOP = 2\langle \cos^2 \theta_i \rangle - 1 = \langle \cos 2\theta_i \rangle = r$ .

## 34 References

- 35 1. Berens P (2009) Circstat: A matlab toolbox for circular statistics. J Stat Softw 31: 1-21.
- 36 2. Batschelet E (1981) Circular Statistics in Biology. London: Academic Press, 371 pp.
