# Supplementary material for: Metrics for Assessing Cytoskeletal Orientational Correlations and Consistency
Source: PubMed Central journal article supplement (PMC4388480; doi:10.1371/journal.pcbi.1004190), 2015-04-07
Supplement: pcbi.1004190.s007.pdf [file pcbi.1004190.s007.pdf]

Table S1. Variables and parameters

| parameters and variables      | definition                                                                          |
|-------------------------------|-------------------------------------------------------------------------------------|
| COOP                          | co-orientational order parameter                                                    |
| OOP                           | orientational order parameter                                                       |
| P                             | construct P, the first construct                                                    |
| $\vec{q}_i$                   | a set of pseudo vectors for construct P                                             |
| $p_{i,x}$                     | a set of pseudo vectors for construct P for the x component                         |
| $p_{i,y}$                     | a set of pseudo vectors for construct P for the y component                         |
| Q                             | construct Q, the second construct                                                   |
| $\vec{q}_i$                   | a set of pseudo vectors for construct Q                                             |
| $q_{i,x}$                     | a set of pseudo vectors for construct Q for x                                       |
| $q_{i,y}$                     | a set of pseudo vectors for construct Q for y                                       |
| $\mathbb{T}_K$                | mean order tensor                                                                   |
| $OOP_K$                       | orientational order construct of K                                                  |
| K                             | either construct P or construct Q                                                   |
| $\vec{k}_i$                   | either a set of pseudo vectors for either construct P or construct Q                |
| $k_{i,x}$                     | the x component of the pseudo vector                                                |
| $k_{i,y}$                     | the y component of the pseudo vector                                                |
| F                             | new field that represents the angle ( $\theta$ ) between the two constructs P and Q |
| $\theta$                      | angle between $\vec{p}_i$ and $\vec{q}_i$ or random noise                           |
| $\vec{f}_i$                   | a set of pseudo vectors for the COOP                                                |
| $f_{i,x}$                     | the x position of the pseudo vector                                                 |
| $f_{i,y}$                     | the y position of the pseudo vector                                                 |
| $\mathbb{T}_{PQ}$             | mean order tensor of the system                                                     |
| $COOP_{PQ}$                   | co-orientational order parameter of P and Q                                         |
| $\hat{n}$                     | the director                                                                        |
| $f'_{i,x}$                    | the x position of the pseudo vector with the switch of P and Q                      |
| $f'_{i,y}$                    | the y position of the pseudo vector with the switch of P and Q                      |
| $COOP_{QP}$                   | co-orientational order parameter of Q and P                                         |
| $\nu$                         | angle used to rotated field                                                         |
| $Q_{rot}$                     | rotated construct Q                                                                 |
| $\vec{q}_{i,rot}$             | a rotated set of pseudo vectors for construct $Q_{rot}$                             |
| $F_{rot}$                     | rotated field F                                                                     |
| $\vec{f}_{i,rot}$             | rotated vectors $\vec{f}_i$                                                         |
| $\langle f_{i,rot,x} \rangle$ | the mean of the rotated vectors in the x position                                   |
| $\langle f_{i,rot,y} \rangle$ | the mean of the rotated vectors in the y position                                   |
| $COOP_{rot}$                  | the rotated COOP                                                                    |
| $\hat{n}_p$                   | the director of construct P                                                         |
| $\hat{n}_q$                   | the director of construct Q                                                         |
| $\theta_0$                    | the mean angle between P and Q                                                      |
| $\alpha$                      | angle of the vector $\vec{p}$                                                       |
| $\beta$                       | angle of the vector $\vec{q}$                                                       |
| $COOP_u$                      | uncorrelated COOP                                                                   |
| COOP anti-cor                 | anti-correlated COOP                                                                |
| $n$                           | $\{1, 2, \dots\}$                                                                   |
| $COOP_c$                      | correlated COOP                                                                     |
| COOP ultra-cor                | ultra-correlated COOP                                                               |
| $\alpha_i$                    | angles of vectors                                                                   |
| $\theta_i$                    | angles of vectors                                                                   |
| $i$                           | $\{1, \dots, n\}$                                                                   |
| Normalized COOP               | the normalized COOP value                                                           |
| $\sigma_{COOP_u}$             | standard deviation of the uncorrelated COOP                                         |
| $\sigma_{COOP_c}$             | standard deviation of the correlated COOP                                           |
| $\sigma_{OOP}$                | the OOP error                                                                       |
| N                             | sample size                                                                         |
| p                             | p-value                                                                             |
| $W_i$                         | weight                                                                              |
| $\rho$                        | density                                                                             |
| $COOP_{sarc}$                 | the COOP of Z-lines for each cell wise comparison                                   |
| $COOP_{actin}$                | the COOP of actin for each cell wise comparison                                     |
